# Supplementary material for: Meals That Differ in Nutrient Composition and Inflammatory Potential Do Not Differentially Impact Postprandial Circulating Cytokines in Older Adults above a Healthy Weight
Source: MDPI journal article supplement (doi:10.3390/nu14071470), 2022-04-01
Supplement: s1 [file s1]

## Supplementary Materials

### Figures

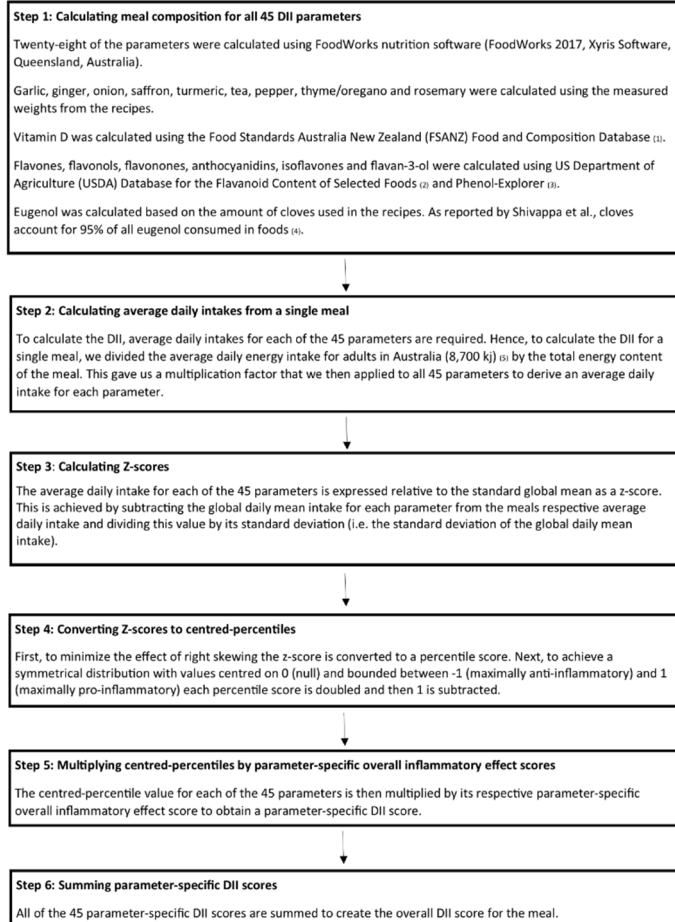

**Figure S1.** Sequence of steps used to calculate the Dietary Inflammatory Index (DII) for study meals. Adapted from Shivappa et al. (4).

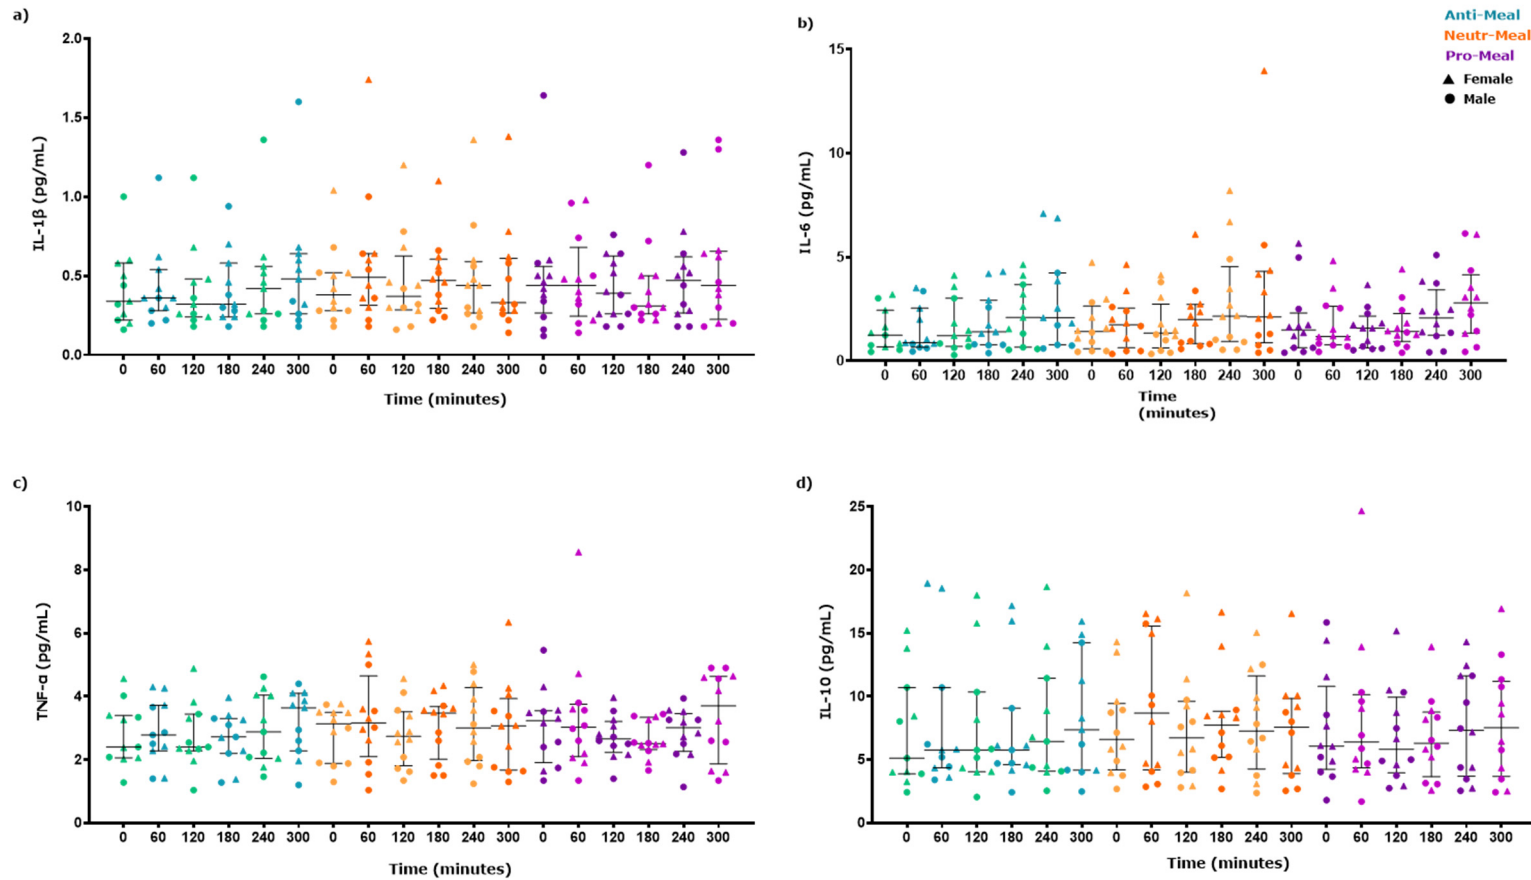

**Figure S2.** Post-prandial plasma (a) IL-1 $\beta$ , (b) IL-6, (c) TNF- $\alpha$ , and (d) IL-10 after ingestion of either the Anti-inflammatory meal, Neutral meal or Pro-inflammatory meal. Raw values are presented with median and interquartile range (IQR) for each time point. For all inflammatory markers one participant has been omitted for the Anti-inflammatory meal due to issues with cannulation. Abbreviations: Anti, anti-inflammatory; Neutr, neutral; Pro, pro-inflammatory.

## Tables

**Table S1.** Dietary Inflammatory Index calculation for the Pro-inflammatory meal.

| Food parameter   | Global daily mean intake (units/d) <sup>1</sup> | Standard deviation <sup>1</sup> | Amount per serve (per meal) | Average daily intake <sup>2</sup> | Z-score <sup>3</sup> | Percentile score <sup>4</sup> | Centred-percentile <sup>5</sup> | Overall inflammatory effect score <sup>6</sup> | DII score <sup>7</sup> |
|------------------|-------------------------------------------------|---------------------------------|-----------------------------|-----------------------------------|----------------------|-------------------------------|---------------------------------|------------------------------------------------|------------------------|
| Alcohol (g)      | 13.98                                           | 3.72                            | 0.00                        | 0.00                              | -3.76                | 0.00                          | -1.00                           | -0.28                                          | 0.28                   |
| Vitamin B12 (µg) | 5.15                                            | 2.70                            | 0.93                        | 3.56                              | -0.59                | 0.28                          | -0.44                           | 0.11                                           | -0.05                  |
| Vitamin B6 (mg)  | 1.47                                            | 0.74                            | 0.08                        | 0.29                              | -1.59                | 0.06                          | -0.89                           | -0.37                                          | 0.32                   |
| β-Carotene (µg)  | 3718.00                                         | 1720.00                         | 21.96                       | 83.80                             | -2.11                | 0.02                          | -0.97                           | -0.58                                          | 0.56                   |
| Caffeine (g)     | 8.05                                            | 6.67                            | 0.00                        | 0.00                              | -1.21                | 0.11                          | -0.77                           | -0.11                                          | 0.08                   |
| Carbohydrate (g) | 272.20                                          | 40.00                           | 25.22                       | 96.25                             | -4.40                | 0.00                          | -1.00                           | 0.10                                           | -0.10                  |
| Cholesterol (mg) | 279.40                                          | 51.20                           | 75.02                       | 286.31                            | 0.13                 | 0.55                          | 0.11                            | 0.11                                           | 0.01                   |
| Energy (kJ)      | 8602.30                                         | 1414.19                         | 2279.67                     | 8700.00                           | 0.07                 | 0.53                          | 0.06                            | 0.18                                           | 0.01                   |
| Eugenol (mg)     | 0.01                                            | 0.08                            | 0.00                        | 0.00                              | -0.13                | 0.45                          | -0.10                           | -0.14                                          | 0.01                   |
| Total fat (g)    | 71.40                                           | 19.40                           | 39.33                       | 150.10                            | 4.06                 | 1.00                          | 1.00                            | 0.30                                           | 0.30                   |
| Fibre (g)        | 18.80                                           | 4.90                            | 1.96                        | 7.48                              | -2.31                | 0.01                          | -0.98                           | -0.66                                          | 0.65                   |
| Folic acid (µg)  | 273.00                                          | 70.70                           | 55.95                       | 213.51                            | -0.84                | 0.20                          | -0.60                           | -0.19                                          | 0.11                   |
| Garlic (g)       | 4.35                                            | 2.90                            | 0.00                        | 0.00                              | -1.50                | 0.07                          | -0.87                           | -0.41                                          | 0.36                   |
| Ginger (g)       | 59.00                                           | 63.20                           | 0.00                        | 0.00                              | -0.93                | 0.18                          | -0.65                           | -0.45                                          | 0.29                   |
| Iron (mg)        | 13.35                                           | 3.71                            | 0.90                        | 3.44                              | -2.67                | 0.00                          | -0.99                           | 0.03                                           | -0.03                  |

| Food parameter      | Global daily mean intake (units/d) <sup>1</sup> | Standard deviation <sup>1</sup> | Amount per serve (per meal) | Average daily intake <sup>2</sup> | Z-score <sup>3</sup> | Percentile score <sup>4</sup> | Centred-percentile <sup>5</sup> | Overall inflammatory effect score <sup>6</sup> | DII score <sup>7</sup> |
|---------------------|-------------------------------------------------|---------------------------------|-----------------------------|-----------------------------------|----------------------|-------------------------------|---------------------------------|------------------------------------------------|------------------------|
| Magnesium (mg)      | 310.10                                          | 139.40                          | 30.53                       | 116.52                            | -1.39                | 0.08                          | -0.84                           | -0.48                                          | 0.40                   |
| MUFA (g)            | 27.00                                           | 6.10                            | 13.69                       | 52.25                             | 4.14                 | 1.00                          | 1.00                            | -0.01                                          | -0.01                  |
| Niacin (mg)         | 25.90                                           | 11.77                           | 7.29                        | 27.82                             | 0.16                 | 0.56                          | 0.13                            | -0.25                                          | -0.03                  |
| n-3 Fatty acids (g) | 1.06                                            | 1.06                            | 0.34                        | 1.31                              | 0.23                 | 0.59                          | 0.19                            | -0.44                                          | -0.08                  |
| n-6 Fatty acids (g) | 10.80                                           | 7.50                            | 1.94                        | 7.40                              | -0.45                | 0.32                          | -0.35                           | -0.16                                          | 0.06                   |
| Onion (g)           | 35.90                                           | 18.40                           | 0.00                        | 0.00                              | -1.95                | 0.03                          | -0.95                           | -0.30                                          | 0.29                   |
| Protein (g)         | 79.40                                           | 13.90                           | 22.21                       | 84.75                             | 0.38                 | 0.65                          | 0.30                            | 0.02                                           | 0.01                   |
| PUFA (g)            | 13.88                                           | 3.76                            | 2.50                        | 9.53                              | -1.16                | 0.12                          | -0.75                           | -0.34                                          | 0.25                   |
| Riboflavin (mg)     | 1.70                                            | 0.79                            | 0.21                        | 0.79                              | -1.16                | 0.12                          | -0.75                           | -0.07                                          | 0.05                   |
| Saffron (g)         | 0.37                                            | 1.78                            | 0.00                        | 0.00                              | -0.21                | 0.42                          | -0.16                           | -0.14                                          | 0.02                   |
| Saturated fat (g)   | 28.60                                           | 8.00                            | 20.45                       | 78.04                             | 6.18                 | 1.00                          | 1.00                            | 0.37                                           | 0.37                   |
| Selenium (µg)       | 67.00                                           | 25.10                           | 18.65                       | 71.16                             | 0.17                 | 0.57                          | 0.13                            | -0.19                                          | -0.03                  |
| Thiamine (mg)       | 1.70                                            | 0.66                            | 0.22                        | 0.84                              | -1.30                | 0.10                          | -0.81                           | -0.10                                          | 0.08                   |
| Trans fat (g)       | 3.15                                            | 3.75                            | 1.00                        | 3.83                              | 0.18                 | 0.57                          | 0.14                            | 0.23                                           | 0.03                   |
| Turmeric (mg)       | 533.60                                          | 754.30                          | 0.00                        | 0.00                              | -0.71                | 0.24                          | -0.52                           | -0.79                                          | 0.41                   |
| Vitamin A (RE)      | 983.90                                          | 518.60                          | 53.84                       | 205.48                            | -1.50                | 0.07                          | -0.87                           | -0.40                                          | 0.35                   |
| Vitamin C (mg)      | 118.20                                          | 43.46                           | 0.25                        | 0.95                              | -2.70                | 0.00                          | -0.99                           | -0.42                                          | 0.42                   |
| Vitamin D           | 6.26                                            | 2.21                            | 0.03                        | 0.10                              | -2.79                | 0.00                          | -0.99                           | -0.45                                          | 0.44                   |

| Food parameter                 | Global daily mean intake (units/d) <sup>1</sup> | Standard deviation <sup>1</sup> | Amount per serve (per meal) | Average daily intake <sup>2</sup> | Z-score <sup>3</sup> | Percentile score <sup>4</sup> | Centred-percentile <sup>5</sup> | Overall inflammatory effect score <sup>6</sup> | DII score <sup>7</sup> |
|--------------------------------|-------------------------------------------------|---------------------------------|-----------------------------|-----------------------------------|----------------------|-------------------------------|---------------------------------|------------------------------------------------|------------------------|
| (µg)                           |                                                 |                                 |                             |                                   |                      |                               |                                 |                                                |                        |
| Vitamin E (mg)                 | 8.73                                            | 1.49                            | 0.64                        | 2.44                              | -4.22                | 0.00                          | -1.00                           | -0.42                                          | 0.42                   |
| Zinc (mg)                      | 9.84                                            | 2.19                            | 1.88                        | 7.16                              | -1.22                | 0.11                          | -0.78                           | -0.31                                          | 0.24                   |
| Green and black tea (g)        | 1.69                                            | 1.53                            | 0.00                        | 0.00                              | -1.10                | 0.13                          | -0.73                           | -0.54                                          | 0.39                   |
| Flavan-3-ol (mg)               | 95.80                                           | 85.90                           | 0.00                        | 0.00                              | -1.12                | 0.13                          | -0.74                           | -0.42                                          | 0.31                   |
| Flavones (mg)                  | 1.55                                            | 0.07                            | 0.00                        | 0.00                              | -22.14               | 0.00                          | -1.00                           | -0.62                                          | 0.62                   |
| Flavonols (mg)                 | 17.70                                           | 6.79                            | 0.00                        | 0.00                              | -2.61                | 0.00                          | -0.99                           | -0.47                                          | 0.46                   |
| Flavonones (mg)                | 11.70                                           | 3.82                            | 0.00                        | 0.00                              | -3.06                | 0.00                          | -1.00                           | -0.25                                          | 0.25                   |
| Anthocyanidin (mg)             | 18.05                                           | 21.14                           | 0.00                        | 0.00                              | -0.85                | 0.20                          | -0.61                           | -0.13                                          | 0.08                   |
| Isoflavones (mg)               | 1.20                                            | 0.20                            | 0.00                        | 0.00                              | -6.00                | 0.00                          | -1.00                           | -0.59                                          | 0.59                   |
| Pepper (g)                     | 10.00                                           | 7.07                            | 0.00                        | 0.00                              | -1.41                | 0.08                          | -0.84                           | -0.13                                          | 0.11                   |
| Thyme and oregano (mg)         | 0.33                                            | 0.99                            | 0.00                        | 0.00                              | -0.33                | 0.37                          | -0.26                           | -0.10                                          | 0.03                   |
| Rosemary (mg)                  | 1.00                                            | 15.00                           | 0.00                        | 0.00                              | -0.07                | 0.47                          | -0.05                           | -0.01                                          | 0.00                   |
| Overall DII Score <sup>8</sup> |                                                 |                                 |                             |                                   |                      |                               |                                 | +9.36                                          |                        |

<sup>1</sup>As calculated and described by Shivappa et al. (4). <sup>2</sup>To calculate a DII score for a single meal, we first divided the average daily energy intake for adults in Australia (8,700 kJ) (5) by the total energy content of the meal. This gave us a multiplication factor (3.726) that we then applied to all 45 parameters to derive an 'average daily intake' for each parameter. <sup>3</sup>Z-scores were derived by subtracting the global daily mean intake for each parameter from their respective average daily intake and dividing this value by its standard deviation. <sup>4</sup>To minimize the effect of right skewing the z-score was converted to a percentile score. <sup>5</sup>To achieve a symmetrical distribution (i.e. centred-percentile) with values centred on 0 (null) and bounded between -1 (maximally anti-inflammatory) and 1 (maximally pro-inflammatory), each percentile score was doubled and then 1 was subtracted. <sup>6</sup>As calculated and described by Shivappa et al. (4). <sup>7</sup>The centred-percentile for each parameter was multiplied by its respective overall inflammatory effect score to obtain a DII score for each parameter. <sup>8</sup>All of the 45 parameter-specific DII scores were summed to create the overall DII score for the meal. Abbreviations: DII, Dietary Inflammatory Index; MUFA, monounsaturated fatty acids; PUFA, polyunsaturated fatty acids.

**Table S2.** Dietary Inflammatory Index calculation for the Neutral meal.

| Food parameter   | Global daily mean intake (units/d) <sup>1</sup> | Standard deviation <sup>1</sup> | Amount per serve (per meal) | Average daily intake <sup>2</sup> | Z-score <sup>3</sup> | Percentile score <sup>4</sup> | Centred-percentile <sup>5</sup> | Overall inflammatory effect score <sup>6</sup> | DII score <sup>7</sup> |
|------------------|-------------------------------------------------|---------------------------------|-----------------------------|-----------------------------------|----------------------|-------------------------------|---------------------------------|------------------------------------------------|------------------------|
| Alcohol (g)      | 13.98                                           | 3.72                            | 0.00                        | 0.00                              | -3.76                | 0.00                          | -1.00                           | -0.28                                          | 0.28                   |
| Vitamin B12 (µg) | 5.15                                            | 2.70                            | 1.00                        | 4.05                              | -0.41                | 0.34                          | -0.32                           | 0.11                                           | -0.03                  |
| Vitamin B6 (mg)  | 1.47                                            | 0.74                            | 0.61                        | 2.45                              | 1.32                 | 0.91                          | 0.81                            | -0.37                                          | -0.30                  |
| β-Carotene (µg)  | 3718.00                                         | 1720.00                         | 2720.90                     | 11011.34                          | 4.24                 | 1.00                          | 1.00                            | -0.58                                          | -0.58                  |
| Caffeine (g)     | 8.05                                            | 6.67                            | 0.00                        | 0.00                              | -1.21                | 0.11                          | -0.77                           | -0.11                                          | 0.08                   |
| Carbohydrate (g) | 272.20                                          | 40.00                           | 42.82                       | 173.27                            | -2.47                | 0.01                          | -0.99                           | 0.10                                           | -0.10                  |
| Cholesterol (mg) | 279.40                                          | 51.20                           | 71.00                       | 287.33                            | 0.15                 | 0.56                          | 0.12                            | 0.11                                           | 0.01                   |
| Energy (kJ)      | 8602.30                                         | 1414.19                         | 2149.77                     | 8700.00                           | 0.07                 | 0.53                          | 0.06                            | 0.18                                           | 0.01                   |
| Eugenol (mg)     | 0.01                                            | 0.08                            | 0.00                        | 0.00                              | -0.13                | 0.45                          | -0.10                           | -0.14                                          | 0.01                   |
| Total fat (g)    | 71.40                                           | 19.40                           | 246.00                      | 995.55                            | 47.64                | 1.00                          | 1.00                            | 0.30                                           | 0.30                   |
| Fibre (g)        | 18.80                                           | 4.90                            | 15.47                       | 62.60                             | 8.94                 | 1.00                          | 1.00                            | -0.66                                          | -0.66                  |
| Folic acid (µg)  | 273.00                                          | 70.70                           | 101.29                      | 409.92                            | 1.94                 | 0.97                          | 0.95                            | -0.19                                          | -0.18                  |
| Garlic (g)       | 4.35                                            | 2.90                            | 1.25                        | 5.06                              | 0.24                 | 0.60                          | 0.19                            | -0.41                                          | -0.08                  |
| Ginger (g)       | 59.00                                           | 63.20                           | 0.00                        | 0.00                              | -0.93                | 0.18                          | -0.65                           | -0.45                                          | 0.29                   |
| Iron (mg)        | 13.35                                           | 3.71                            | 5.09                        | 20.61                             | 1.96                 | 0.97                          | 0.95                            | 0.03                                           | 0.03                   |
| Magnesium (mg)   | 310.10                                          | 139.40                          | 121.16                      | 490.33                            | 1.29                 | 0.90                          | 0.80                            | -0.48                                          | -0.39                  |

| Food parameter      | Global daily mean intake (units/d) <sup>1</sup> | Standard deviation <sup>1</sup> | Amount per serve (per meal) | Average daily intake <sup>2</sup> | Z-score <sup>3</sup> | Percentile score <sup>4</sup> | Centred-percentile <sup>5</sup> | Overall inflammatory effect score <sup>6</sup> | DII score <sup>7</sup> |
|---------------------|-------------------------------------------------|---------------------------------|-----------------------------|-----------------------------------|----------------------|-------------------------------|---------------------------------|------------------------------------------------|------------------------|
| MUFA (g)            | 27.00                                           | 6.10                            | 5.32                        | 21.53                             | -0.90                | 0.19                          | -0.63                           | -0.01                                          | 0.01                   |
| Niacin (mg)         | 25.90                                           | 11.77                           | 20.45                       | 82.78                             | 4.83                 | 1.00                          | 1.00                            | -0.25                                          | -0.25                  |
| n-3 Fatty acids (g) | 1.06                                            | 1.06                            | 0.36                        | 1.47                              | 0.39                 | 0.65                          | 0.30                            | -0.44                                          | -0.13                  |
| n-6 Fatty acids (g) | 10.80                                           | 7.50                            | 1.05                        | 4.27                              | -0.87                | 0.19                          | -0.62                           | -0.16                                          | 0.10                   |
| Onion (g)           | 35.90                                           | 18.40                           | 28.75                       | 116.35                            | 4.37                 | 1.00                          | 1.00                            | -0.30                                          | -0.30                  |
| Protein (g)         | 79.40                                           | 13.90                           | 43.12                       | 174.49                            | 6.84                 | 1.00                          | 1.00                            | 0.02                                           | 0.02                   |
| PUFA (g)            | 13.88                                           | 3.76                            | 1.46                        | 5.90                              | -2.12                | 0.02                          | -0.97                           | -0.34                                          | 0.33                   |
| Riboflavin (mg)     | 1.70                                            | 0.79                            | 0.38                        | 1.53                              | -0.22                | 0.41                          | -0.17                           | -0.07                                          | 0.01                   |
| Saffron (g)         | 0.37                                            | 1.78                            | 0.00                        | 0.00                              | -0.21                | 0.42                          | -0.16                           | -0.14                                          | 0.02                   |
| Saturated fat (g)   | 28.60                                           | 8.00                            | 6.21                        | 25.15                             | -0.43                | 0.33                          | -0.33                           | 0.37                                           | -0.12                  |
| Selenium (µg)       | 67.00                                           | 25.10                           | 24.14                       | 97.71                             | 1.22                 | 0.89                          | 0.78                            | -0.19                                          | -0.15                  |
| Thiamine (mg)       | 1.70                                            | 0.66                            | 0.37                        | 1.50                              | -0.30                | 0.38                          | -0.24                           | -0.10                                          | 0.02                   |
| Trans fat (g)       | 3.15                                            | 3.75                            | 0.25                        | 1.00                              | -0.57                | 0.28                          | -0.43                           | 0.23                                           | -0.10                  |
| Turmeric (mg)       | 533.60                                          | 754.30                          | 0.00                        | 0.00                              | -0.71                | 0.24                          | -0.52                           | -0.79                                          | 0.41                   |
| Vitamin A (RE)      | 983.90                                          | 518.60                          | 513.49                      | 2078.07                           | 2.11                 | 0.98                          | 0.97                            | -0.40                                          | -0.39                  |
| Vitamin C (mg)      | 118.20                                          | 43.46                           | 88.53                       | 358.28                            | 5.52                 | 1.00                          | 1.00                            | -0.42                                          | -0.42                  |
| Vitamin D (µg)      | 6.26                                            | 2.21                            | 6.81                        | 27.33                             | 9.53                 | 1.00                          | 1.00                            | -0.45                                          | -0.45                  |
| Vitamin E (mg)      | 8.73                                            | 1.49                            | 4.02                        | 16.26                             | 5.06                 | 1.00                          | 1.00                            | -0.42                                          | -0.42                  |

| Food parameter                       | Global daily mean intake (units/d) <sup>1</sup> | Standard deviation <sup>1</sup> | Amount per serve (per meal) | Average daily intake <sup>2</sup> | Z-score <sup>3</sup> | Percentile score <sup>4</sup> | Centred-percentile <sup>5</sup> | Overall inflammatory effect score <sup>6</sup> | DII score <sup>7</sup> |
|--------------------------------------|-------------------------------------------------|---------------------------------|-----------------------------|-----------------------------------|----------------------|-------------------------------|---------------------------------|------------------------------------------------|------------------------|
| Zinc (mg)                            | 9.84                                            | 2.19                            | 3.78                        | 15.28                             | 2.48                 | 0.99                          | 0.99                            | -0.31                                          | -0.31                  |
| Green and black tea (g)              | 1.69                                            | 1.53                            | 0.00                        | 0.00                              | -1.10                | 0.13                          | -0.73                           | -0.54                                          | 0.39                   |
| Flavan-3-ol (mg)                     | 95.80                                           | 85.90                           | 2.01                        | 8.06                              | -1.02                | 0.15                          | -0.69                           | -0.42                                          | 0.29                   |
| Flavones (mg)                        | 1.55                                            | 0.07                            | 0.55                        | 2.23                              | 9.65                 | 1.00                          | 1.00                            | -0.62                                          | -0.62                  |
| Flavonols (mg)                       | 17.70                                           | 6.79                            | 13.78                       | 55.28                             | 5.53                 | 1.00                          | 1.00                            | -0.47                                          | -0.47                  |
| Flavonones (mg)                      | 11.70                                           | 3.82                            | 0.00                        | 0.00                              | -3.06                | 0.00                          | -1.00                           | -0.25                                          | 0.25                   |
| Anthocyanidin (mg)                   | 18.05                                           | 21.14                           | 0.00                        | 0.00                              | -0.85                | 0.20                          | -0.61                           | -0.13                                          | 0.08                   |
| Isoflavones (mg)                     | 1.20                                            | 0.20                            | 0.00                        | 0.00                              | -5.98                | 0.00                          | -1.00                           | -0.59                                          | 0.59                   |
| Pepper (g)                           | 10.00                                           | 7.07                            | 0.00                        | 0.00                              | -1.41                | 0.08                          | -0.84                           | -0.13                                          | 0.11                   |
| Thyme and oregano (mg)               | 0.33                                            | 0.99                            | 0.00                        | 0.00                              | -0.33                | 0.37                          | -0.26                           | -0.10                                          | 0.03                   |
| Rosemary (mg)                        | 1.00                                            | 15.00                           | 0.00                        | 0.00                              | -0.07                | 0.47                          | -0.05                           | -0.01                                          | 0.00                   |
| <b>Overall DII Score<sup>8</sup></b> |                                                 |                                 |                             |                                   |                      |                               |                                 | <b>-2.76</b>                                   |                        |

<sup>1</sup>As calculated and described by Shivappa et al. (4). <sup>2</sup>To calculate a DII score for a single meal, we first divided the average daily energy intake for adults in Australia (8,700 kJ) (5) by the total energy content of the meal. This gave us a multiplication factor (3.726) that we then applied to all 45 parameters to derive an 'average daily intake' for each parameter. <sup>3</sup>Z-scores were derived by subtracting the global daily mean intake for each parameter from their respective average daily intake and dividing this value by its standard deviation. <sup>4</sup>To minimize the effect of right skewing the z-score was converted to a percentile score. <sup>5</sup>To achieve a symmetrical distribution (i.e. centred-percentile) with values centred on 0 (null) and bounded between -1 (maximally anti-inflammatory) and 1 (maximally pro-inflammatory), each percentile score was doubled and then 1 was subtracted. <sup>6</sup>As calculated and described by Shivappa et al. (4). <sup>7</sup>The centred-percentile for each parameter was multiplied by its respective overall inflammatory effect score to obtain a DII score for each parameter. <sup>8</sup>All of the 45 parameter-specific DII scores were summed to create the overall DII score for the meal. Abbreviations: DII, Dietary Inflammatory Index; MUFA, monounsaturated fatty acids; PUFA, polyunsaturated fatty acids.



**Table S3.** Dietary Inflammatory Index calculation for the Anti-inflammatory meal.

| Food parameter   | Global daily mean intake (units/d) <sup>1</sup> | Standard deviation <sup>1</sup> | Amount per serve (per meal) | Average daily intake <sup>2</sup> | Z-score <sup>3</sup> | Percentile score <sup>4</sup> | Centred-percentile <sup>5</sup> | Overall inflammatory effect score <sup>6</sup> | DII score <sup>7</sup> |
|------------------|-------------------------------------------------|---------------------------------|-----------------------------|-----------------------------------|----------------------|-------------------------------|---------------------------------|------------------------------------------------|------------------------|
| Alcohol (g)      | 13.98                                           | 3.72                            | 0.00                        | 0.00                              | -3.76                | 0.00                          | -1.00                           | -0.28                                          | 0.28                   |
| Vitamin B12 (µg) | 5.15                                            | 2.70                            | 0.30                        | 1.12                              | -1.49                | 0.07                          | -0.86                           | 0.11                                           | -0.09                  |
| Vitamin B6 (mg)  | 1.47                                            | 0.74                            | 1.22                        | 4.54                              | 4.15                 | 1.00                          | 1.00                            | -0.37                                          | -0.36                  |
| β-Carotene (µg)  | 3718.00                                         | 1720.00                         | 2699.62                     | 10058.21                          | 3.69                 | 1.00                          | 1.00                            | -0.58                                          | -0.58                  |
| Caffeine (g)     | 8.05                                            | 6.67                            | 0.00                        | 0.00                              | -1.21                | 0.11                          | -0.77                           | -0.11                                          | 0.08                   |
| Carbohydrate (g) | 272.20                                          | 40.00                           | 53.15                       | 198.02                            | -1.85                | 0.03                          | -0.94                           | 0.10                                           | -0.09                  |
| Cholesterol (mg) | 279.40                                          | 51.20                           | 22.03                       | 82.09                             | -3.85                | 0.00                          | -1.00                           | 0.11                                           | -0.11                  |
| Energy (kJ)      | 8602.30                                         | 1414.19                         | 2335.08                     | 8700.00                           | 0.07                 | 0.53                          | 0.06                            | 0.18                                           | 0.01                   |
| Eugenol (mg)     | 0.01                                            | 0.08                            | 22.04                       | 82.11                             | 1026.22              | 1.00                          | 1.00                            | -0.14                                          | -0.14                  |
| Total fat (g)    | 71.40                                           | 19.40                           | 21.89                       | 81.57                             | 0.52                 | 0.70                          | 0.40                            | 0.30                                           | 0.12                   |
| Fibre (g)        | 18.80                                           | 4.90                            | 19.01                       | 70.81                             | 10.61                | 1.00                          | 1.00                            | -0.66                                          | -0.66                  |
| Folic acid (µg)  | 273.00                                          | 70.70                           | 117.26                      | 436.87                            | 2.32                 | 0.99                          | 0.98                            | -0.19                                          | -0.19                  |
| Garlic (g)       | 4.35                                            | 2.90                            | 2.00                        | 7.45                              | 1.07                 | 0.86                          | 0.72                            | -0.41                                          | -0.29                  |
| Ginger (g)       | 59.00                                           | 63.20                           | 0.88                        | 3.26                              | -0.88                | 0.19                          | -0.62                           | -0.45                                          | 0.28                   |
| Iron (mg)        | 13.35                                           | 3.71                            | 7.24                        | 26.96                             | 3.67                 | 1.00                          | 1.00                            | 0.03                                           | 0.03                   |
| Magnesium (mg)   | 310.10                                          | 139.40                          | 214.65                      | 799.73                            | 3.51                 | 1.00                          | 1.00                            | -0.48                                          | -0.48                  |
| MUFA (g)         | 27.00                                           | 6.10                            | 9.36                        | 34.88                             | 1.29                 | 0.90                          | 0.80                            | -0.01                                          | -0.01                  |

| Food parameter      | Global daily mean intake (units/d) <sup>1</sup> | Standard deviation <sup>1</sup> | Amount per serve (per meal) | Average daily intake <sup>2</sup> | Z-score <sup>3</sup> | Percentile score <sup>4</sup> | Centred-percentile <sup>5</sup> | Overall inflammatory effect score <sup>6</sup> | DII score <sup>7</sup> |
|---------------------|-------------------------------------------------|---------------------------------|-----------------------------|-----------------------------------|----------------------|-------------------------------|---------------------------------|------------------------------------------------|------------------------|
| Niacin (mg)         | 25.90                                           | 11.77                           | 13.20                       | 49.18                             | 1.98                 | 0.98                          | 0.95                            | -0.25                                          | -0.23                  |
| n-3 Fatty acids (g) | 1.06                                            | 1.06                            | 4.62                        | 17.21                             | 15.23                | 1.00                          | 1.00                            | -0.44                                          | -0.44                  |
| n-6 Fatty acids (g) | 10.80                                           | 7.50                            | 2.53                        | 9.42                              | -0.18                | 0.43                          | -0.15                           | -0.16                                          | 0.02                   |
| Onion (g)           | 35.90                                           | 18.40                           | 19.25                       | 71.72                             | 1.95                 | 0.97                          | 0.95                            | -0.30                                          | -0.29                  |
| Protein (g)         | 79.40                                           | 13.90                           | 25.72                       | 95.82                             | 1.18                 | 0.88                          | 0.76                            | 0.02                                           | 0.02                   |
| PUFA (g)            | 13.88                                           | 3.76                            | 7.18                        | 26.74                             | 3.42                 | 1.00                          | 1.00                            | -0.34                                          | -0.34                  |
| Riboflavin (mg)     | 1.70                                            | 0.79                            | 0.46                        | 1.70                              | -0.01                | 0.50                          | 0.00                            | -0.07                                          | 0.00                   |
| Saffron (g)         | 0.37                                            | 1.78                            | 0.03                        | 0.11                              | -0.15                | 0.44                          | -0.12                           | -0.14                                          | 0.02                   |
| Saturated fat (g)   | 28.60                                           | 8.00                            | 3.42                        | 12.75                             | -1.98                | 0.02                          | -0.95                           | 0.37                                           | -0.36                  |
| Selenium (µg)       | 67.00                                           | 25.10                           | 15.95                       | 59.41                             | -0.30                | 0.38                          | -0.24                           | -0.19                                          | 0.05                   |
| Thiamine (mg)       | 1.70                                            | 0.66                            | 0.65                        | 2.41                              | 1.10                 | 0.86                          | 0.73                            | -0.10                                          | -0.07                  |
| Trans fat (g)       | 3.15                                            | 3.75                            | 0.02                        | 0.08                              | -0.82                | 0.21                          | -0.59                           | 0.23                                           | -0.13                  |
| Turmeric (mg)       | 533.60                                          | 754.30                          | 875.00                      | 3260.06                           | 3.61                 | 1.00                          | 1.00                            | -0.79                                          | -0.78                  |
| Vitamin A (RE)      | 983.90                                          | 518.60                          | 456.00                      | 1698.96                           | 1.57                 | 0.94                          | 0.88                            | -0.40                                          | -0.35                  |
| Vitamin C (mg)      | 118.20                                          | 43.46                           | 74.09                       | 276.03                            | 3.63                 | 1.00                          | 1.00                            | -0.42                                          | -0.42                  |
| Vitamin D (µg)      | 6.26                                            | 2.21                            | 1.5                         | 5.59                              | -0.30                | 0.38                          | -0.24                           | -0.45                                          | 0.11                   |
| Vitamin E (mg)      | 8.73                                            | 1.49                            | 7.97                        | 29.69                             | 14.07                | 1.00                          | 1.00                            | -0.42                                          | -0.42                  |
| Zinc                | 9.84                                            | 2.19                            | 3.69                        | 13.75                             | 1.06                 | 0.86                          | 0.71                            | -0.31                                          | -0.22                  |

| Food parameter                 | Global daily mean intake (units/d) <sup>1</sup> | Standard deviation <sup>1</sup> | Amount per serve (per meal) | Average daily intake <sup>2</sup> | Z-score <sup>3</sup> | Percentile score <sup>4</sup> | Centred-percentile <sup>5</sup> | Overall inflammatory effect score <sup>6</sup> | DII score <sup>7</sup> |
|--------------------------------|-------------------------------------------------|---------------------------------|-----------------------------|-----------------------------------|----------------------|-------------------------------|---------------------------------|------------------------------------------------|------------------------|
| (mg)                           |                                                 |                                 |                             |                                   |                      |                               |                                 |                                                |                        |
| Green and black tea (g)        | 1.69                                            | 1.53                            | 0.00                        | 0.00                              | -1.10                | 0.13                          | -0.73                           | -0.54                                          | 0.39                   |
| Flavan-3-ol (mg)               | 95.80                                           | 85.90                           | 2.09                        | 7.77                              | -1.02                | 0.15                          | -0.69                           | -0.42                                          | 0.29                   |
| Flavones (mg)                  | 1.55                                            | 0.07                            | 18.57                       | 69.18                             | 966.12               | 1.00                          | 1.00                            | -0.62                                          | -0.62                  |
| Flavonols (mg)                 | 17.70                                           | 6.79                            | 15.49                       | 57.73                             | 5.90                 | 1.00                          | 1.00                            | -0.47                                          | -0.47                  |
| Flavonones (mg)                | 11.70                                           | 3.82                            | 100.06                      | 372.80                            | 94.53                | 1.00                          | 1.00                            | -0.25                                          | -0.25                  |
| Anthocyanidin (mg)             | 18.05                                           | 21.14                           | 28.28                       | 105.36                            | 4.13                 | 1.00                          | 1.00                            | -0.13                                          | -0.13                  |
| Isoflavones (mg)               | 1.20                                            | 0.20                            | 0.02                        | 0.06                              | -5.68                | 0.00                          | -1.00                           | -0.59                                          | 0.59                   |
| Pepper (g)                     | 10.00                                           | 7.07                            | 0.28                        | 1.02                              | -32.64               | 0.00                          | -1.00                           | -0.13                                          | 0.13                   |
| Thyme and oregano (mg)         | 0.33                                            | 0.99                            | 875.00                      | 3260.06                           | 3.73                 | 1.00                          | 1.00                            | -0.10                                          | -0.10                  |
| Rosemary (mg)                  | 1.00                                            | 15.00                           | 875.00                      | 3428.25                           | 3.92                 | 1.00                          | 1.00                            | -0.01                                          | -0.01                  |
| Overall DII Score <sup>8</sup> |                                                 |                                 |                             |                                   |                      |                               |                                 | <b>-6.24</b>                                   |                        |

<sup>1</sup>As calculated and described by Shivappa et al. (4). <sup>2</sup>To calculate a DII score for a single meal, we first divided the average daily energy intake for adults in Australia (8,700 kJ) (5) by the total energy content of the meal. This gave us a multiplication factor (3.726) that we then applied to all 45 parameters to derive an 'average daily intake' for each parameter. <sup>3</sup>Z-scores were derived by subtracting the global daily mean intake for each parameter from their respective average daily intake and dividing this value by its standard deviation. <sup>4</sup>To minimize the effect of right skewing the z-score was converted to a percentile score. <sup>5</sup>To achieve a symmetrical distribution (i.e. centred-percentile) with values centred on 0 (null) and bounded between -1 (maximally anti-inflammatory) and 1 (maximally pro-inflammatory), each percentile score was doubled and then 1 was subtracted. <sup>6</sup>As calculated and described by Shivappa et al. (4). <sup>7</sup>The centred-percentile for each parameter was multiplied by its respective overall inflammatory effect score to obtain a DII score for each parameter. <sup>8</sup>All of the 45 parameter-specific DII scores were summed to create the overall DII score for the meal. Abbreviations: DII, Dietary Inflammatory Index; MUFA, monounsaturated fatty acids; PUFA, polyunsaturated fatty acids.

**Table S4.** Postprandial inflammatory and metabolic measures for the Anti-meal, Neutr-meal and Pro-meal stratified by sex.

| Outcome <sup>1</sup>           | sex    | n | Anti-meal                      | Neutr-meal                      | Pro-meal                          | P-value <sup>2</sup> |
|--------------------------------|--------|---|--------------------------------|---------------------------------|-----------------------------------|----------------------|
| IL-6 iAUC (pg/mL·min)          | Female | 6 | 236.7 (52.7 – 476.7)           | 157.6 (85.8 – 416.8)            | 120.8 (39.4 – 166.9)              | 0.311                |
|                                | Male   | 5 | 36.0 (5.1 – 79.7)              | 58.2 (18.7 – 58.8)              | 24.6 (3.2 – 142.9)                | 0.549                |
| IL-1 $\beta$ iAUC (pg/mL·min)  | Female | 6 | 24.0 (4.5 – 28.5)              | 20.8 (4.0 – 44.6)               | 3.4 (0.2 – 19.9)                  | 0.311                |
|                                | Male   | 5 | 7.7 (3.3 – 30.4)               | 12.9 (4.0 – 22.9)               | 15.7 (3.5 – 20.4)                 | 0.549                |
| TNF- $\alpha$ iAUC (pg/mL·min) | Female | 6 | 130.6 (5.1 – 146.7)            | 121.5 (0.3 – 288.5)             | 67.2 (12.8 – 174.1)               | 0.607                |
|                                | Male   | 5 | 72.0 (7.0 – 123.2)             | 64.2 (6.0 – 116.9)              | 72.7 (9.6 – 190.2)                | 0.165                |
| IL10 iAUC (pg/mL·min)          | Female | 6 | 355.0 (102.6 – 792.6)          | 301.8 (104.1 – 431.4)           | 130.8 (0 – 484.6)                 | 0.513                |
|                                | Male   | 5 | 135.3 (29.8 – 216.0)           | 102.6 (51.4 – 301.6)            | 163.6 (24.3 – 430.2)              | 0.819                |
| Glucose iAUC (mmol/L·min)      | Female | 6 | 24.2 (8.2 – 170.6)             | 34.0 (21.3 – 75.9)              | 14.9 (5.1 – 49.0)                 | 0.135                |
|                                | Male   | 5 | 34.0 (4.5– 88.3)               | 46.3 (23.3 – 63.8)              | 36.8 (19.2 – 61.8)                | 1.000                |
| Insulin iAUC (mIU/L·min)       | Female | 6 | 1752.0 (1106.4 – 3391.6)       | 2152.5 (1538.1 – 3629.7)        | 2932.5 (1500.4 – 3427.6)          | 0.846                |
|                                | Male   | 5 | 1693.5 (711.6 – 2775.0)        | 3259.5 (1707.8 – 4531.5)        | 2440.5 (1303.5 – 3840.8)          | 0.074                |
| TAG iAUC (mmol/L·min)          | Female | 6 | 20.1 (8.8 - 47.0) <sup>a</sup> | 58.8 (30.2 - 77.8) <sup>a</sup> | 121.9 (43.3 - 230.5) <sup>b</sup> | 0.042                |
|                                | Male   | 5 | 31.9 (6.0 - 61.1)              | 65.1 (53.9 - 76.1)              | 140.0 (47.6 - 152.5)              | 0.165                |
| TC iAUC (mmol/L·min)           | Female | 6 | 0.32 (0 – 17.52)               | 0 (0 – 4.42)                    | 0 (0 – 1.77)                      | 0.931                |
|                                | Male   | 5 | 0 (0 – 0)                      | 0.01 (0 – 9.39)                 | 0 (0 – 0.52)                      | 0.174                |

<sup>1</sup>Data are presented as median (Q<sub>1</sub> – Q<sub>3</sub>), inflammatory marker, glucose and insulin are analysed from blood plasma and triglycerides and total cholesterol are analysed from blood serum.

<sup>2</sup>Friedman test followed by pairwise comparisons using Wilcoxon signed-rank test were used to make comparisons between the three test meals. \*Unpaired letters <sup>ab</sup> indicates a significant difference between meals. Abbreviations: A, anti-inflammatory; N, neutral; P, pro-inflammatory, TAG, triglycerides; TC, total cholesterol; iAUC, incremental area under curve.

## References

1. Food Standards Australia New Zealand. Australian Food Composition Database. 2019. Available online: <https://www.foodstandards.gov.au/science/monitoringnutrients/afcd/Pages/default.aspx> (accessed on 20 February 2020).
2. U.S. Department of Agriculture. USDA Database for the Flavonoid Content of Selected Foods, Maryland. 2016. Available online: <https://data.nal.usda.gov/dataset/usda-database-flavonoid-content-selected-foods-release-32-november-2015> (accessed on 20 February 2020).
3. Rothwell, J.A.; Perez-Jimenez, J.; Neveu, V.; Medina-Remon, A.; M'hiri, N.; García-Lobato, P.; Manach, C.; Knox, C.; Eisner, R.; Wishart, D.S.; et al. Phenol-Explorer 3.0: A major update of the Phenol-Explorer database to incorporate data on the effects of food processing on polyphenol content. *Database* **2013**, *2013*, bat070. <https://doi.org/10.1093/database/bat070>.
4. Shivappa, N.; Steck, S.E.; Hurley, T.G.; Hussey, J.R.; Hébert, J.R. Designing and developing a literature derived, population-based dietary inflammatory index. *Public Health Nutr.* **2014**, *17*, 1689–1696.
5. Australian Bureau of Statistics. 4802.0 – National Nutrition Survey: Selected Highlights, Australia, 1995. 1997. Available online: <https://www.abs.gov.au/AUSSTATS/abs@.nsf/DetailsPage/4802.01995?OpenDocument> (accessed on 20 February 2020).
